# Supplementary material for: The Acute, Short-, and Long-Term Effects of Endurance Exercise on Skeletal Muscle Transcriptome Profiles
Source: MDPI journal article supplement (doi:10.3390/ijms25052881), 2024-03-01
Supplement: s1 [file s1]

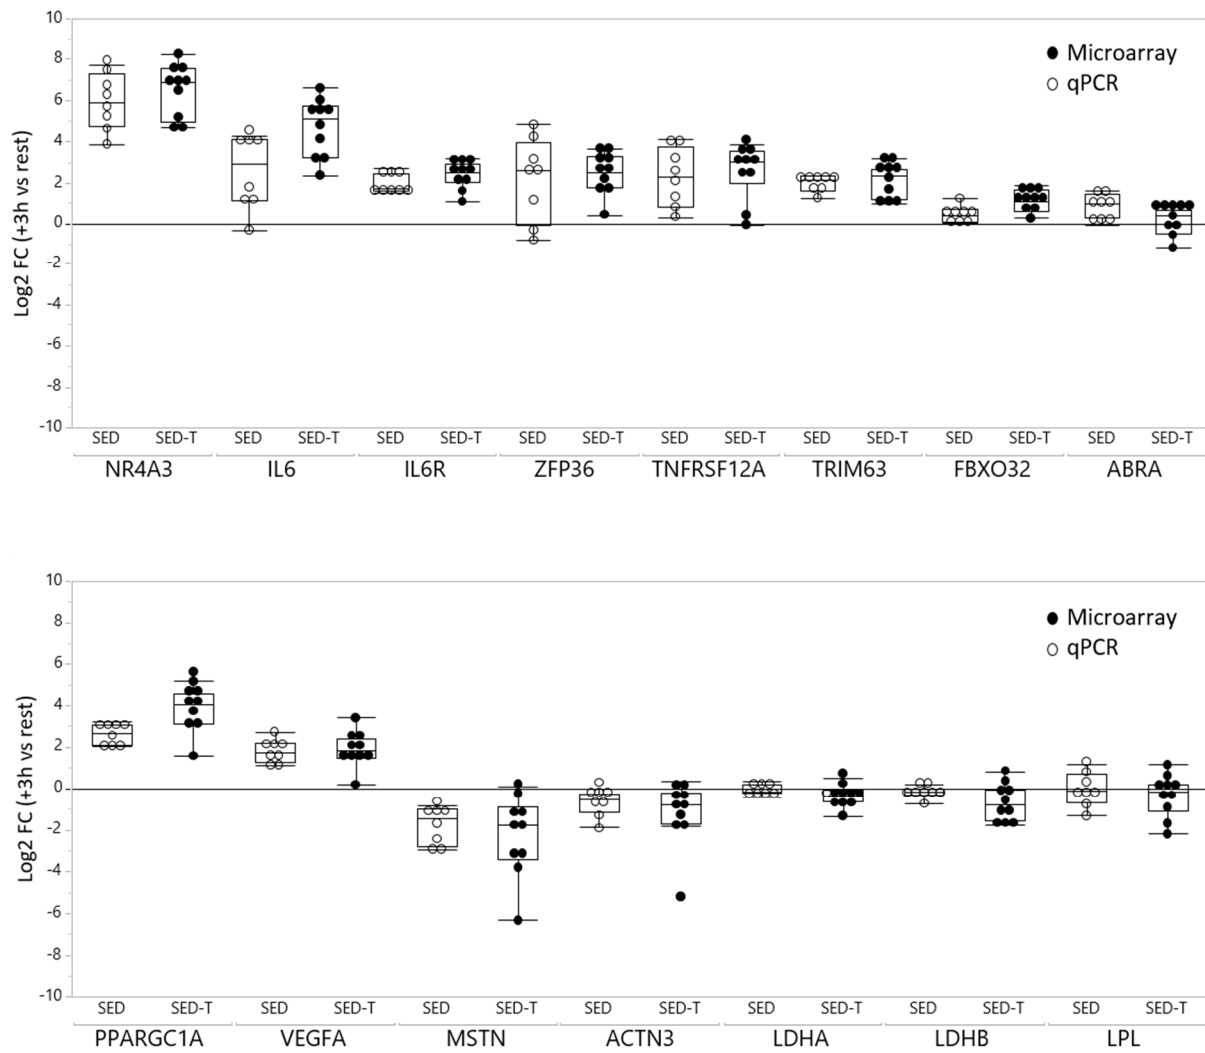

**Figure S1.**

Independent validation of microarray data from sedentary individuals (SED, n = 8, open circles) for exercise-responsiveness of 15 selected target genes in a second cohort of untrained individuals (SED-T, n = 10, filled circles) using qPCR. Box plots represent Log2 transformed fold changes in mRNA levels from *vastus lateralis* muscle at 3 hours (+3h) after intense cycling exercise in comparison to baseline levels at rest (+3h/rest).

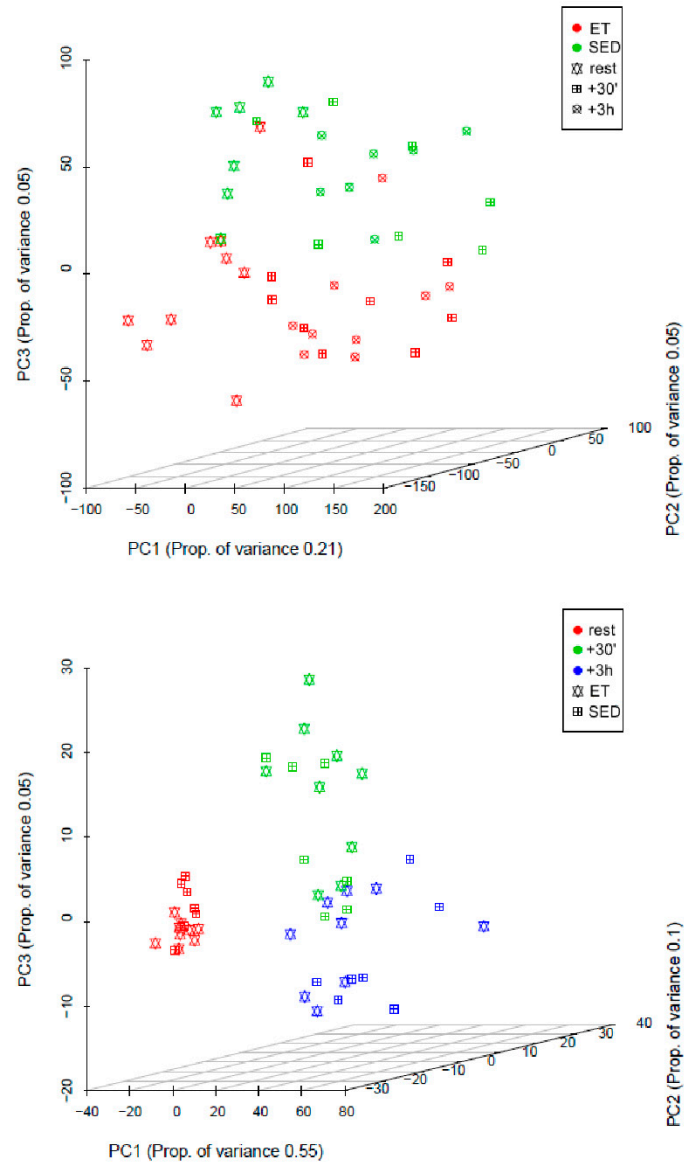

**Figure S2.**

Principal component analysis (PCA) scatter plots of gene expression profiles of *vastus lateralis* muscle samples from endurance-trained (ET) and sedentary (SED) individuals at baseline (rest), at 30 min (+30') and at 3 hours (+3h) after intense cycling exercise.

**Table S2** (next page)

List of genes among differentially expressed genes at rest (fold difference  $\geq 1.5$ ,  $P < 0.05$ ) between endurance-trained (ET) and sedentary (SED) individuals in *vastus lateralis* muscle that were significantly affected by acute exercise in at least one group at any post-exercise time point (fold change  $\geq 2$ ,  $P < 0.05$ ). Mean fold differences in baseline expression levels (rest) are given in the comparison ET/SED with genes that showed relative higher expression levels in the ET group (ET $\uparrow$ ), and in the comparison SED/ET when baseline levels were higher in the SED group (SED $\uparrow$ ). Gene expression changes in response to acute exercise are given as mean fold changes compared to baseline expression at 30 min (+30') after completion of exercise, and after a recovery period of 3 hours (+3h). Positive fold change values indicate increased expression after exercise ( $\uparrow$ ) while negative fold change values ( $\downarrow$ ) indicate decreased expression in the respective group.

| Gene symbol    | Gene title                                                                       | Baseline expression pattern |                 |         | Exercise response pattern |                     |                    |             |                     |                    |
|----------------|----------------------------------------------------------------------------------|-----------------------------|-----------------|---------|---------------------------|---------------------|--------------------|-------------|---------------------|--------------------|
|                |                                                                                  | Rest                        |                 |         | +30'                      |                     |                    | +3h         |                     |                    |
|                |                                                                                  | Up-regulated in             | Fold difference | P-value | Affected in               | Fold change vs rest | P-value            | Affected in | Fold change vs rest | P-value            |
| <i>PFKFB2</i>  | 6-phosphofructo-2-kinase/fructose-2,6-biphosphatase 2                            | ET↑                         | 2.7             | 7.3E-05 |                           |                     |                    | ET↑<br>SED↑ | 2.0<br>3.5          | 1.4E-05<br>1.4E-03 |
| <i>SLC38A1</i> | Sodium-coupled neutral amino acid transporter 1                                  | ET↑                         | 1.6             | 1.3E-02 |                           |                     |                    | ET↑<br>SED↑ | 2.6<br>2.8          | 1.3E-04<br>1.0E-03 |
| <i>PPP1R1C</i> | Protein phosphatase 1, regulatory (inhibitor) subunit 1C                         | ET↑                         | 1.7             | 4.5E-02 | ET↓<br>SED↓               | -2.3<br>-2.1        | 2.0E-03<br>9.6E-04 | ET↓         | -2.3                | 2.5E-03            |
| <i>CEACAM1</i> | Carcinoembryonic antigen-related cell adhesion molecule 1 (biliary glycoprotein) | ET↑                         | 1.5             | 4.3E-03 |                           |                     |                    | ET↑<br>SED↑ | 2.2<br>2.0          | 3.9E-05<br>4.3E-06 |
| <i>CASP4</i>   | Caspase 4, apoptosis-related cysteine peptidase                                  | ET↑                         | 1.5             | 8.1E-03 | ET↑<br>SED↑               | 2.7<br>2.3          | 5.6E-04<br>1.3E-03 | ET↑<br>SED↑ | 2.9<br>2.0          | 2.4E-04<br>4.4E-03 |
| <i>PIM3</i>    | Pim-3 oncogene                                                                   | ET↑                         | 1.6             | 3.1E-04 |                           |                     |                    | SED↑        | 2.5                 | 2.0E-08            |
| <i>BCAR3</i>   | Breast cancer anti-estrogen resistance 3                                         | ET↑                         | 1.9             | 2.0E-02 |                           |                     |                    | SED↑        | 3.0                 | 9.9E-04            |
| <i>AQP7</i>    | Aquaporin 7                                                                      | ET↑                         | 1.8             | 3.2E-03 | SED↓                      | -2.1                | 2.6E-02            |             |                     |                    |
| <i>TNFSF10</i> | Tumor necrosis factor (ligand) superfamily, member 10                            | ET↑                         | 1.5             | 1.1E-02 | ET↓                       | -2.4                | 1.5E-07            |             |                     |                    |
| <i>CYP4V2</i>  | Cytochrome P450, family 4, subfamily V, polypeptide 2                            | ET↑                         | 2.1             | 1.8E-02 | ET↓                       | -2.1                | 1.4E-02            |             |                     |                    |
| <i>PAQR9</i>   | Progestin and adipoQ receptor family member IX                                   | ET↑                         | 1.8             | 3.3E-02 | ET↓                       | -2.6                | 1.2E-03            |             |                     |                    |
| <i>FILIP1L</i> | Filamin A interacting protein 1-like                                             | SED↑                        | 1.6             | 8.5E-03 | ET↓<br>SED↓               | -2.4<br>-3.6        | 1.0E-02<br>1.3E-02 | ET↓<br>SED↓ | -2.4<br>-3.6        | 1.0E-02<br>1.3E-02 |
| <i>MSTN</i>    | Myostatin                                                                        | SED↑                        | 2.6             | 1.4E-03 | SED↓                      | -2.9                | 4.2E-03            | ET↓<br>SED↓ | -2.0<br>-3.1        | 6.8E-03<br>2.5E-03 |
| <i>DNAJB4</i>  | DnaJ (Hsp40) homolog, subfamily B, member 4                                      | SED↑                        | 1.6             | 6.0E-04 | ET↑<br>SED↑               | 2.1<br>2.0          | 5.6E-07<br>4.0E-04 |             |                     |                    |
| <i>RND3</i>    | Rho family GTPase 3                                                              | SED↑                        | 1.7             | 3.5E-02 |                           |                     |                    | ET↑<br>SED↑ | 2.3<br>2.1          | 2.6E-03<br>1.1E-04 |
| <i>KY</i>      | Kyphocoliosis peptidase                                                          | SED↑                        | 1.6             | 5.0E-02 | ET↓<br>SED↓               | -2.0<br>-2.0        | 9.7E-07<br>1.7E-02 | ET↓<br>SED↓ | -2.3<br>-2.2        | 9.4E-08<br>1.4E-03 |
| <i>PMP22</i>   | Peripheral myelin protein 22                                                     | SED↑                        | 1.5             | 2.7E-02 |                           |                     |                    | ET↑<br>SED↑ | 3.8<br>2.4          | 9.7E-08<br>9.4E-04 |
| <i>DTNA</i>    | Dystrobrevin, alpha                                                              | SED↑                        | 1.6             | 1.3E-02 | ET↑<br>SED↑               | 7.5<br>6.3          | 1.2E-03<br>3.8E-03 | ET↑<br>SED↑ | 4.0<br>4.3          | 1.8E-02<br>1.7E-02 |
| <i>MLF1</i>    | Myeloid leukemia factor 1                                                        | SED↑                        | 1.7             | 1.4E-04 | SED↓                      | -2.2                | 2.3E-03            |             |                     |                    |
| <i>PLAGL2</i>  | Pleiomorphic adenoma gene-like 2                                                 | SED↑                        | 2.0             | 4.0E-05 |                           |                     |                    | SED↓        | -2.4                | 5.9E-07            |
| <i>SLC38A4</i> | Sodium-Coupled neutral amino acid transporter 4                                  | SED↑                        | 1.9             | 4.3E-04 |                           |                     |                    | SED↓        | -2.1                | 4.6E-03            |
| <i>GLRX</i>    | Glutaredoxin (thioltransferase)                                                  | SED↑                        | 1.9             | 4.0E-02 | SED↑                      | 2.0                 | 3.5E-02            |             |                     |                    |
| <i>IRX3</i>    | Iroquois homeobox 3                                                              | SED↑                        | 2.3             | 8.6E-05 | SED↓                      | -2.0                | 4.7E-03            |             |                     |                    |
| <i>ATP2B2</i>  | ATPase, Ca++ transporting, plasma membrane 2                                     | SED↑                        | 2.2             | 2.1E-02 | SED↓                      | -2.5                | 1.9E-02            |             |                     |                    |
| <i>LMOD1</i>   | Leiomodin 1                                                                      | SEDS↑                       | 1.9             | 2.1E-02 | SED↓                      | -2.4                | 8.5E-03            | SED↓        | -2.1                | 2.4E-02            |
| <i>XPO4</i>    | Exportin 4                                                                       | SED↑                        | 1.7             | 9.8E-03 | SED↓                      | -2.1                | 1.1E-02            |             |                     |                    |
| <i>PRKAG3</i>  | Protein kinase, AMP-activated, gamma 3 non-catalytic subunit                     | SED↑                        | 2.2             | 2.8E-03 | SED↓                      | -2.1                | 2.6E-02            |             |                     |                    |
| <i>ABRA</i>    | Actin-binding Rho activating protein                                             | SED↑                        | 2.6             | 1.3E-06 | ET↑                       | 4.4                 | 8.5E-07            | ET↑         | 2.5                 | 1.5E-05            |
| <i>TSC22D2</i> | TSC22 domain family, member 2                                                    | SED↑                        | 1.7             | 1.4E-05 | ET↑                       | 2.2                 | 1.1E-06            | ET↑         | 2.3                 | 4.1E-07            |
| <i>CHMP1B</i>  | Chromatin modifying protein 1B                                                   | SED↑                        | 1.7             | 4.4E-04 | ET↑                       | 2.3                 | 1.8E-06            | ET↑         | 2.3                 | 1.1E-06            |
| <i>GPD1</i>    | Glycerol-3-phosphate dehydrogenase 1 (soluble)                                   | SED↑                        | 1.6             | 4.7E-02 | ET↓                       | -2.1                | 3.8E-03            |             |                     |                    |
| <i>LITAF</i>   | Lipopolysaccharide-induced TNF factor                                            | SED↑                        | 1.6             | 9.9E-03 | ET↑                       | 2.0                 | 3.0E-04            | ET↑         | 2.1                 | 1.1E-04            |
| <i>IL32</i>    | Interleukin 32                                                                   | SED↑                        | 2.5             | 1.2E-02 | ET↑                       | 2.3                 | 1.7E-02            |             |                     |                    |
| <i>PKNOX1</i>  | PBX/knotted 1 homeobox 1                                                         | SED↑                        | 1.5             | 1.0E-02 | ET↑                       | 2.0                 | 3.5E-04            |             |                     |                    |
| <i>CHST3</i>   | Carbohydrate (chondroitin 6) sulfotransferase 3                                  | SED↑                        | 1.7             | 5.0E-03 | ET↑                       | 2.1                 | 2.7E-04            |             |                     |                    |

**Table S3.** List of primers for qPCR analysis

| Gene symbol | Gene name                                             | Forward primer          | Reverse primer         | Amplicon length (bp) | Primer efficiency |
|-------------|-------------------------------------------------------|-------------------------|------------------------|----------------------|-------------------|
| ABRA        | Actin Binding Rho Activating Protein                  | CCTTGCCCTCCAGGTAAAC     | CCCTTTCAAGTTGCCCACTG   | 86                   | 1.85              |
| ACTN3       | Actinin alpha 3                                       | CGCAGGACATCAACACCAAG    | CGGAGCCTCTCGTTTACCTG   | 106                  | 1.90              |
| B2M         | Beta-2-Microglobulin                                  | TTTCTGGCCTGGAGGCTATC    | CGGATGGATGAAACCCAGAC   | 117                  | 1.90              |
| FBXO32      | F-Box Protein 32                                      | GACAAAGGGCAGCTGGATTG    | TTATTGGCAGTGCACGGATG   | 149                  | 1.90              |
| GAPDH       | Glyceraldehyde-3-Phosphate Dehydrogenase              | TCAACAGCGACACCCACTCC    | TGAGGTCCACCACCTGTTG    | 126                  | 1.95              |
| IL6         | Interleukin 6                                         | GCCAGAGCTGTGCAGATGAG    | TGGGTCAGGGGTGTTATTG    | 90                   | 1.85              |
| IL6R        | Interleukin 6 receptor                                | CAGCTGGGACTGTGCACTTG    | AGCCTTTGTCGTAGGGATG    | 134                  | 1.90              |
| LDHA        | Lactate Dehydrogenase A                               | GGAAAGGCTGGGAGTTCACC    | TCCACTCCATACAGGCACACTG | 85                   | 1.90              |
| LDHB        | Lactate Dehydrogenase B                               | TCCAGATTATCCCGTGTC      | CGGGCATTGAGGATACATGG   | 92                   | 1.95              |
| LPL         | Lipoprotein Lipase                                    | TTGGAGAAGCTATCCGCGTG    | TCGTGGGAGCACTTCACTAGC  | 72                   | 1.85              |
| MSTN        | Myostatin                                             | ATGACGATTATCACGCTACAACG | TGGGTTTTCCATCCACTTGC   | 84                   | 2.00              |
| NR4A3       | Nuclear receptor subfamily 4 group A member 3         | CAAGCCTTAGCCTGCCTGTC    | GTGGGCTCCAGAGCCTGTC    | 143                  | 1.90              |
| PPARGC1A    | PPARG Coactivator 1 Alpha                             | TCCCACACAGTCGCAGTC      | CCTTGGGGTCATTGGTGAC    | 91                   | 1.90              |
| RPL13A      | Ribosomal Protein L13a                                | CTCAAGGTCGTGCTCTGAAG    | GTGGCTGTCACTGCCTGGTAC  | 94                   | 2.00              |
| RPLP0       | Ribosomal Protein Lateral Stalk Subunit P0            | TCAACGGGTACAAACGAGTCC   | CAGATGGATCAGCCAAGAAGG  | 96                   | 1.95              |
| TBP         | TATA-Box Binding Protein                              | GATCAAACCCAGAATTGTTCTCC | AGCCATTACGTCGTCTTCCTG  | 143                  | 1.90              |
| TNFRSF12A   | Tumor necrosis factor receptor superfamily member 12A | AGAGAAGTTCACCACCCCATATA | GGCAGAGACTGGCTCTAGAATG | 141                  | 1.95              |
| TRIM63      | Tripartite Motif Containing 63                        | GAGGATTCCCCTCGAGTGAC    | CCAGGATGGCATACAACGTG   | 88                   | 1.90              |
| UCP3        | Uncoupling Protein 3                                  | TGCTGAGGTGGTGACCTACG    | CAAAGTGGCAGGGGAAGTTG   | 83                   | 1.95              |
| VEGFA       | Vascular Endothelial Growth Factor A                  | AAAACACAGACTCGCGTTGC    | ATCTGGTTCCCGAAACCTG    | 126                  | 1.90              |
| ZFP36       | Zinc finger protein 36                                | ACTTCAGCGCTCCCACTCTC    | GTCCCTCCATGGTCGGATG    | 129                  | 1.85              |
